# Supplementary material for: Assessment of the aggregation and adsorption behavior of newly synthesized tetradecylpyridinium-based metallosurfactants and their interaction with bovine serum albumin
Source: Royal Society of Chemistry journal article supplement (doi:10.1039/d0nj02169e), 2020-01-01
Supplement: d0nj02169e1.pdf [file d0nj02169e1.pdf]

**Electronic Supplementary Information for the Manuscript:**

**Assessment of aggregation and adsorption behavior of newly synthesized tetradecylpyridinium-based metallosurfactants and their interaction with bovine serum albumin†**

Tariq Ahmad Wagay,\* K. Ismail<sup>a</sup> and Hassan Askari

Department of Chemistry, North-Eastern Hill University, Shillong – 793022, India

**Address for Manuscript Correspondence:** Dr. Tariq Ahmad Wagay, Department of Chemistry, North-Eastern Hill University, NEHU Campus, Shillong-793022, India. E-mail: [twagay@gmail.com](mailto:twagay@gmail.com); [tawagay@nehu.ac.in](mailto:tawagay@nehu.ac.in), Telephone: 91-364 – 2722611

<sup>a</sup> Present address: Retired Professor, H. No. 4, Rangpur Path, F. A. Ahmed Nagar, Guwahati – 781022, India, E-mail: [kinehu@hotmail.com](mailto:kinehu@hotmail.com)

†Electronic supplementary information available: Protocol for the synthesis of TP<sub>2</sub>[MCl<sub>4</sub>] metallosurfactants (Scheme S1), photographs of the anhydrous metal(II) chlorides, TPC and synthesized TP<sub>2</sub>[MCl<sub>4</sub>] metallosurfactants (Fig. S1), <sup>1</sup>H NMR spectra (Fig. S2), <sup>13</sup>C NMR spectra (Fig. S3) and FTIR spectra of TPC and TP<sub>2</sub>[MCl<sub>4</sub>] metallosurfactants (Fig. S4).

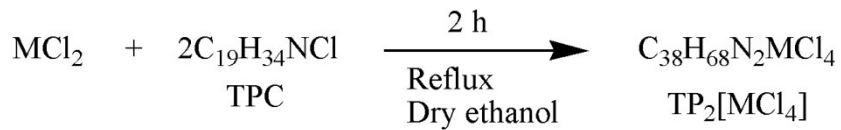

M = Mn, Co, Ni, Cu, Zn

Scheme S1. Protocol for the synthesis of TP<sub>2</sub>[MCl<sub>4</sub>] metallosurfactants.

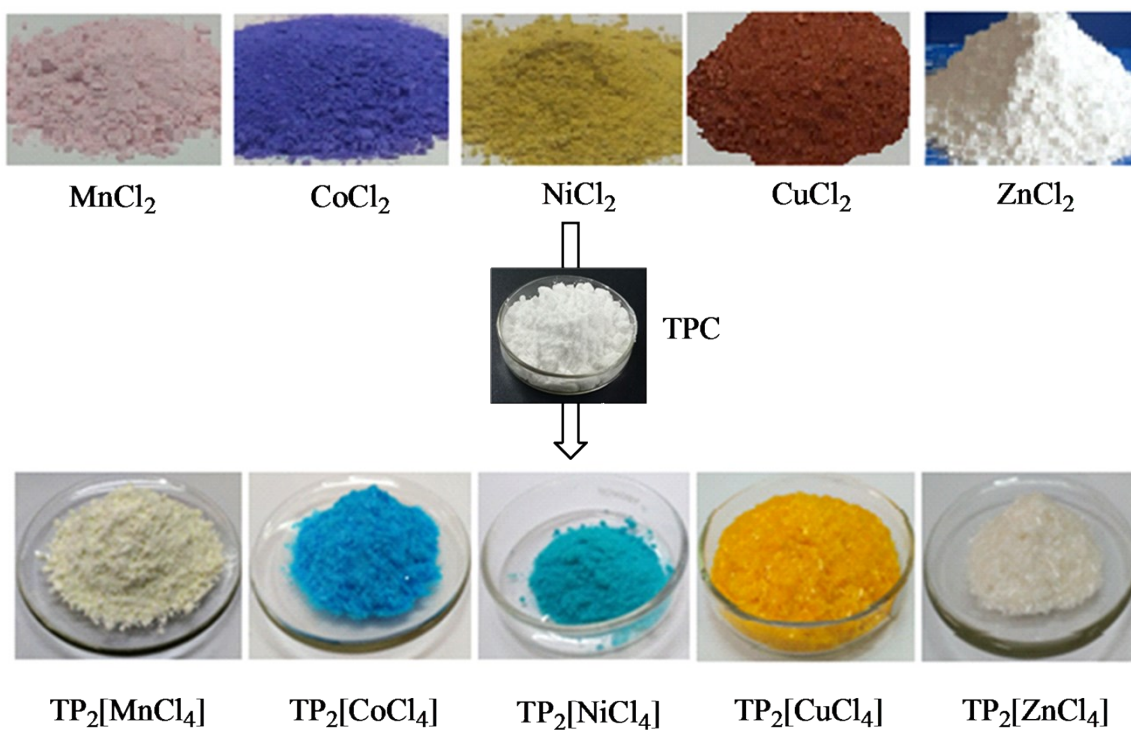

Fig. S1. Photographs of the anhydrous metal(II) chlorides, TPC and synthesized TP<sub>2</sub>[MCl<sub>4</sub>] metallosurfactants.

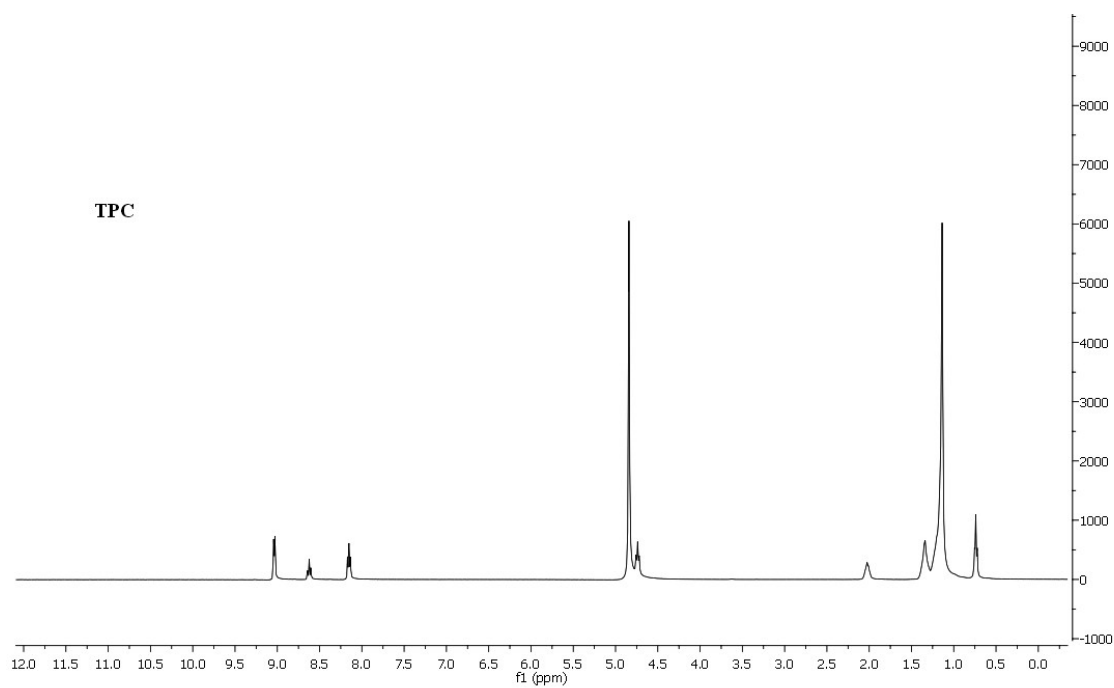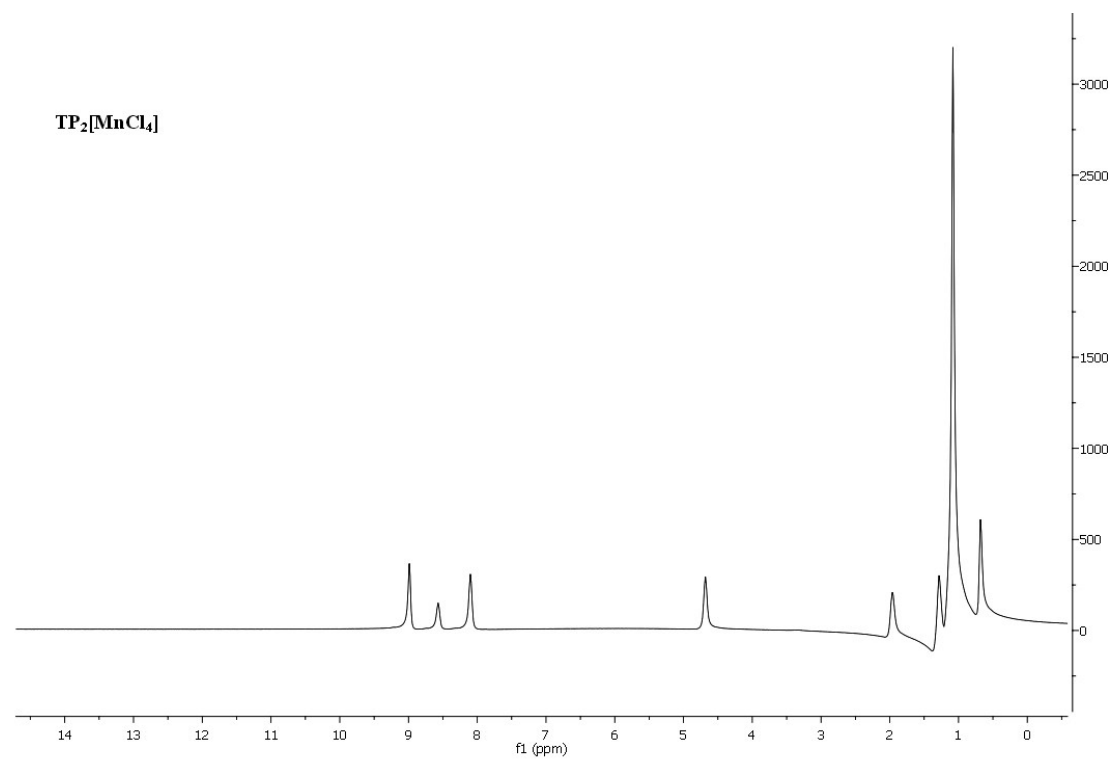

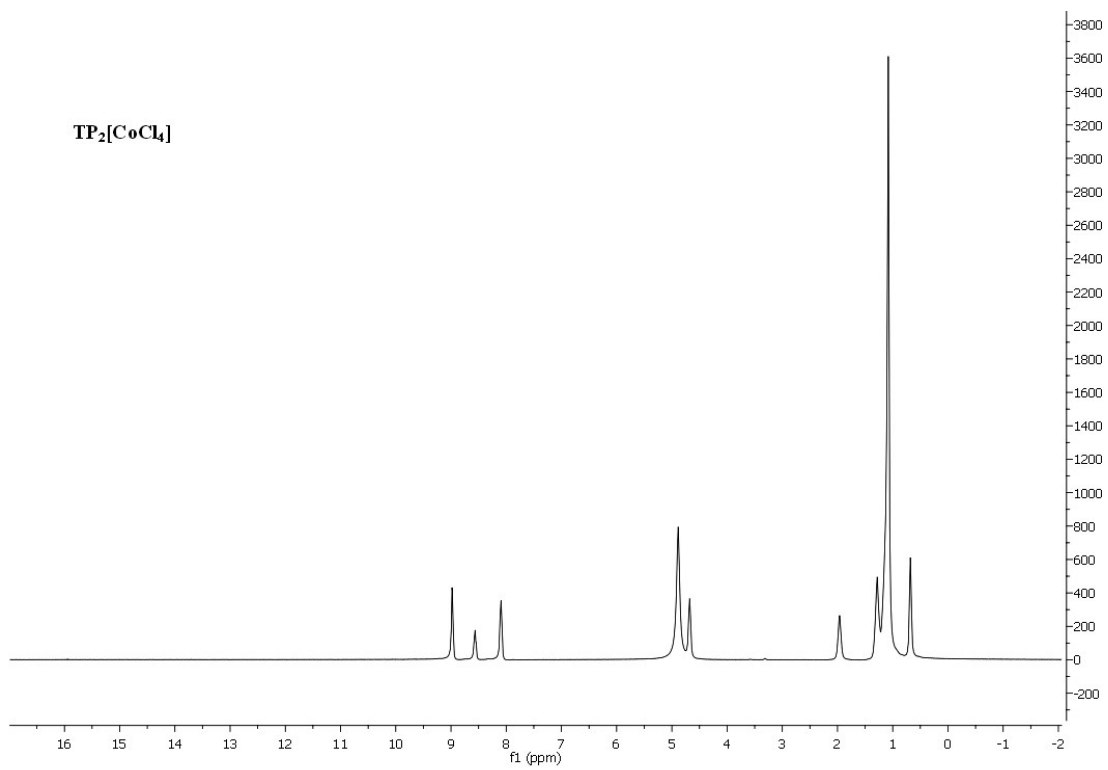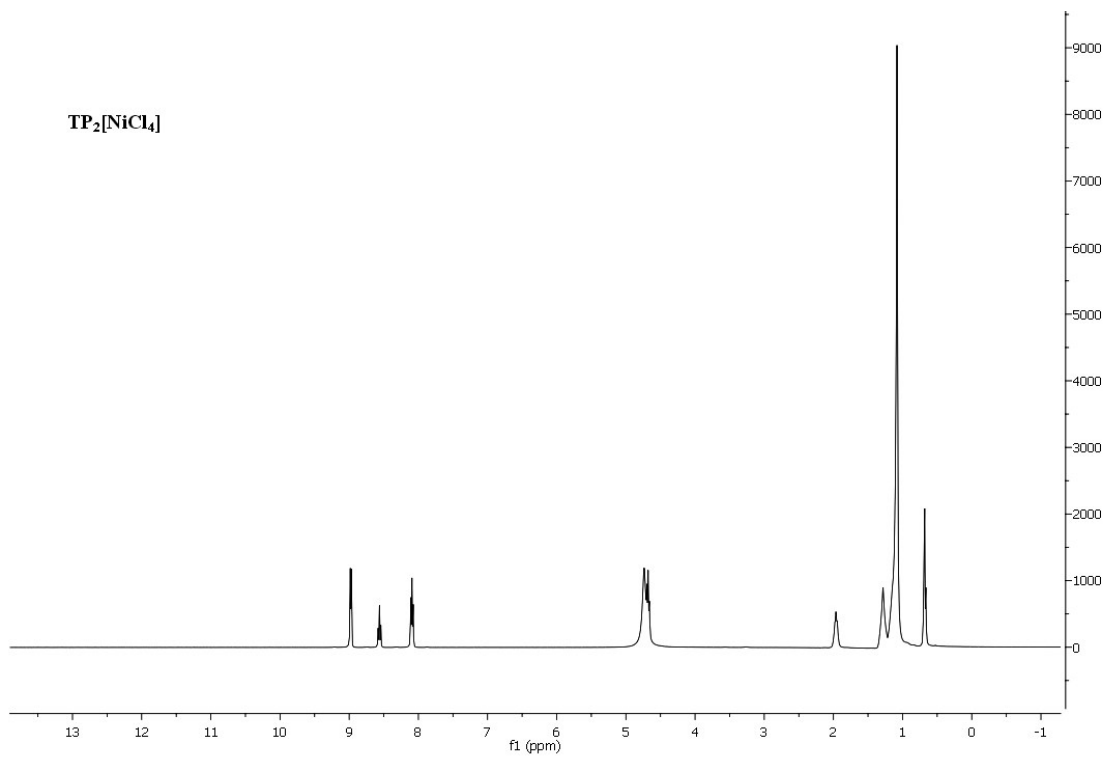

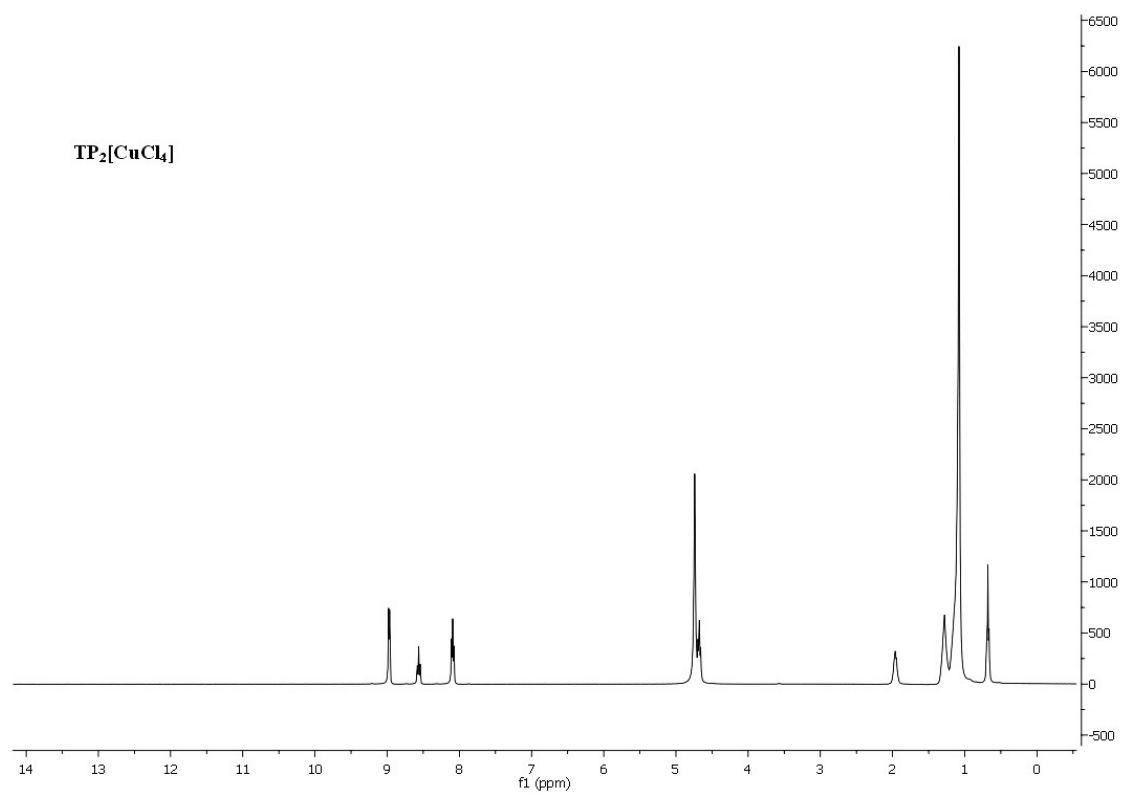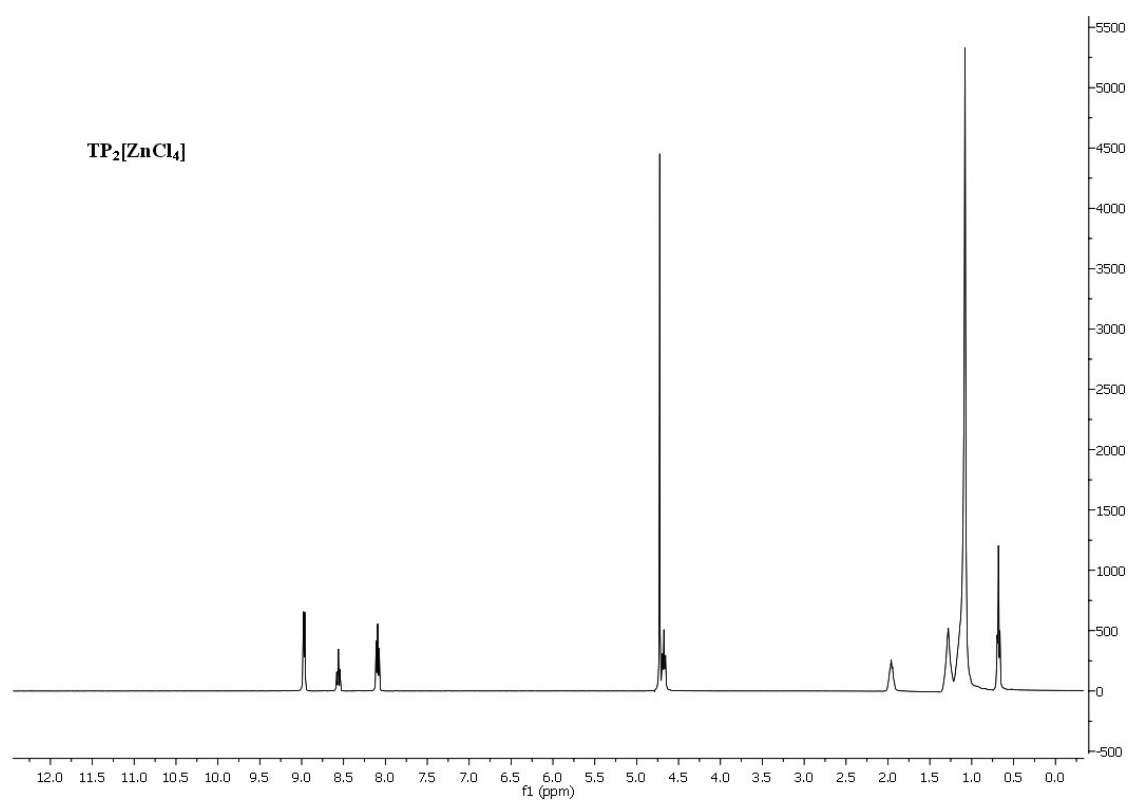

Fig. S2. <sup>1</sup>H NMR spectra of TPC and TP<sub>2</sub>[MCl<sub>4</sub>] metallosurfactants.

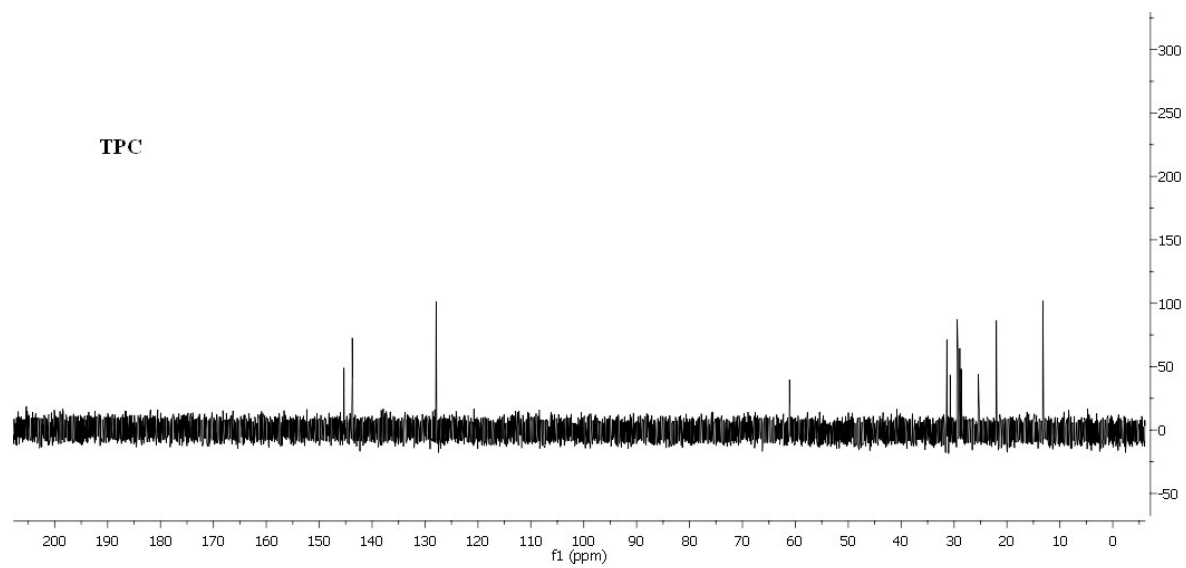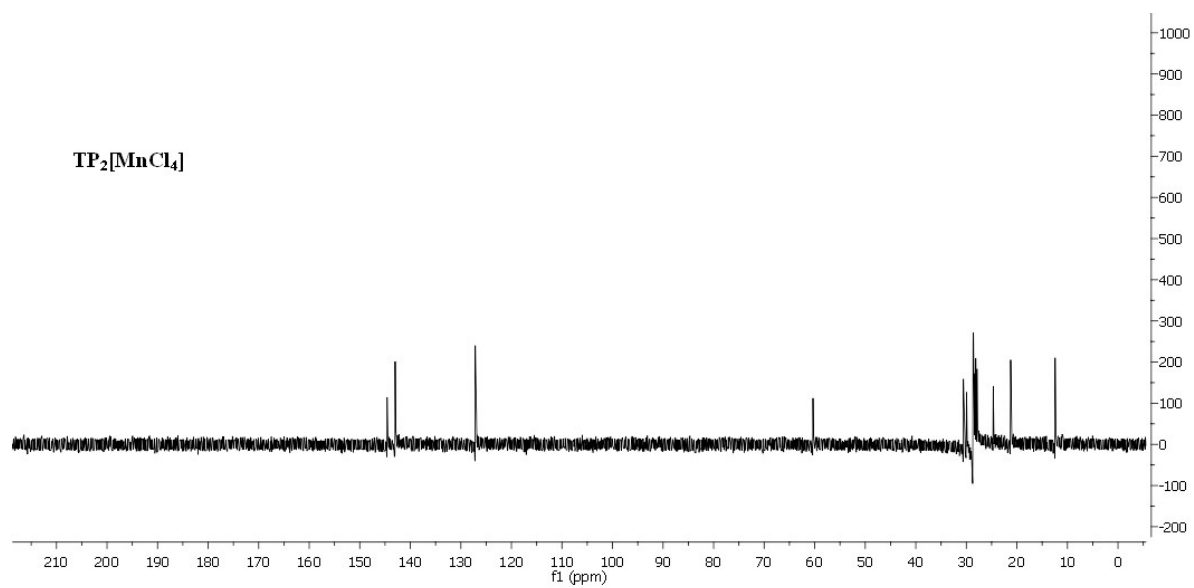

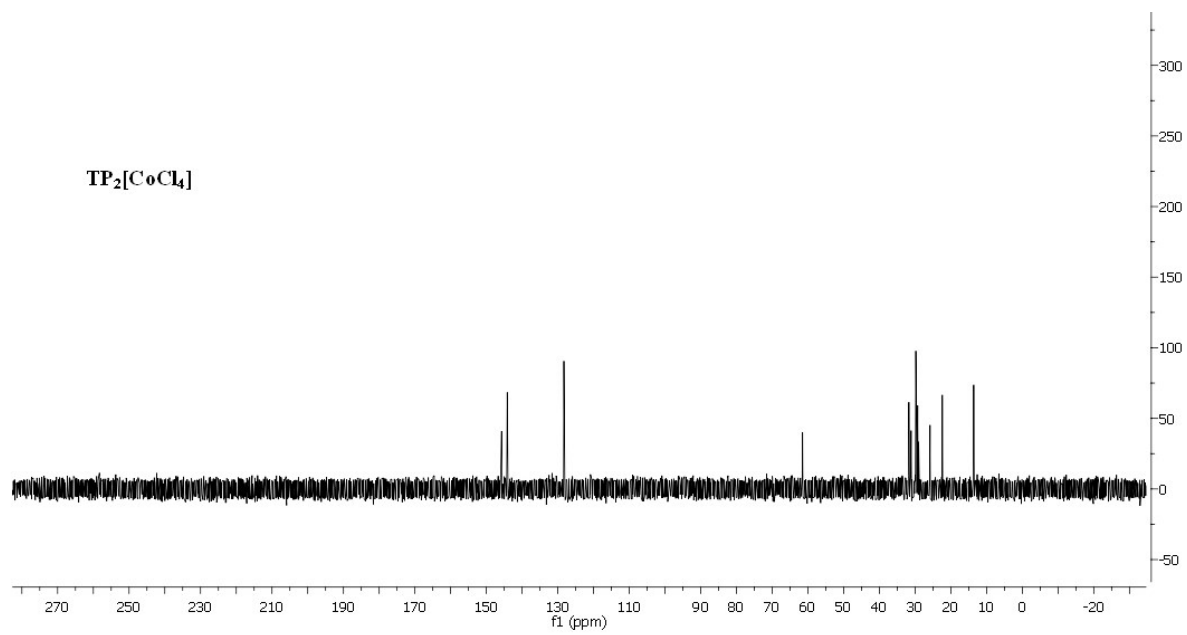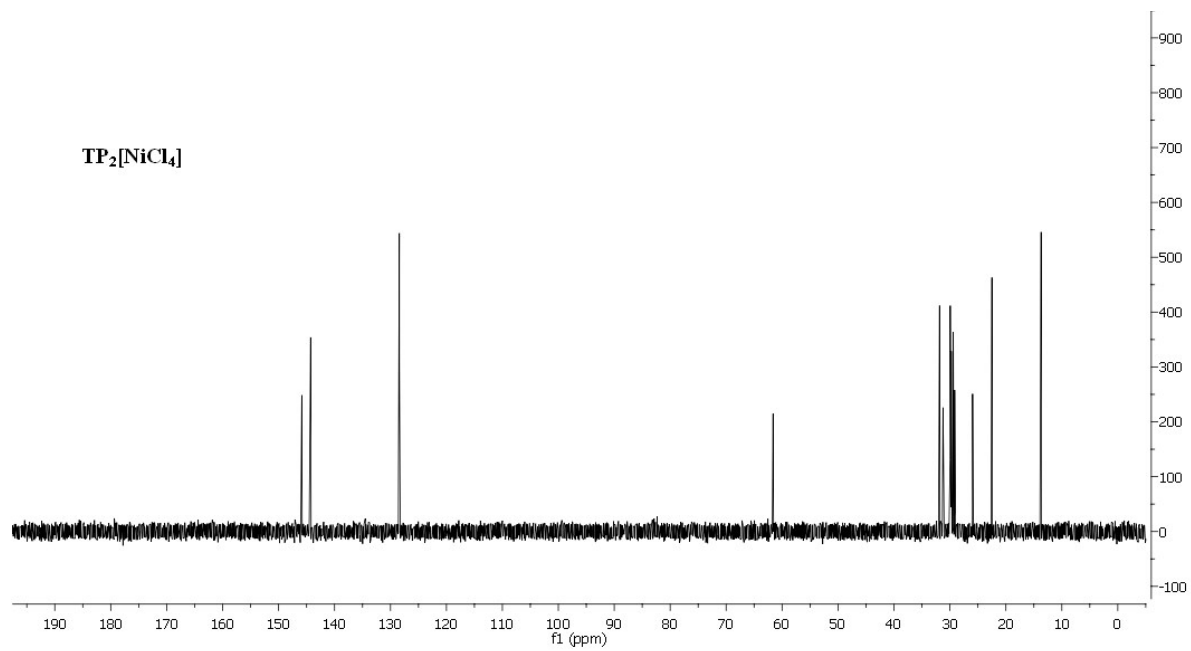

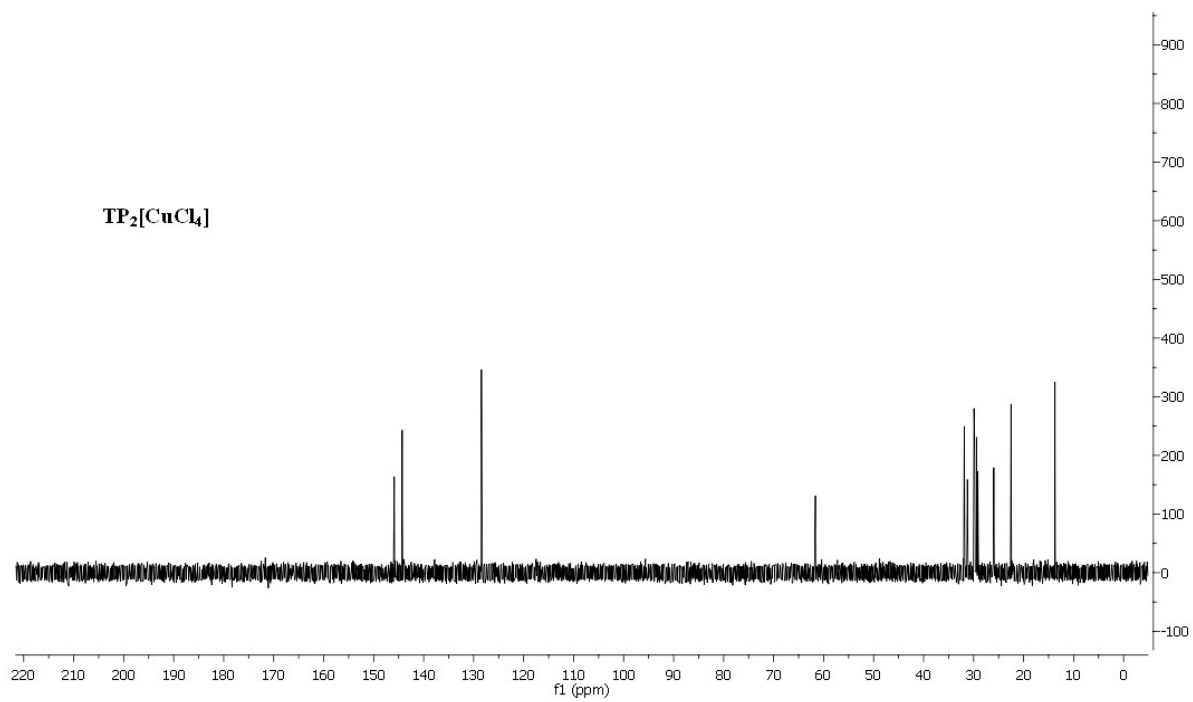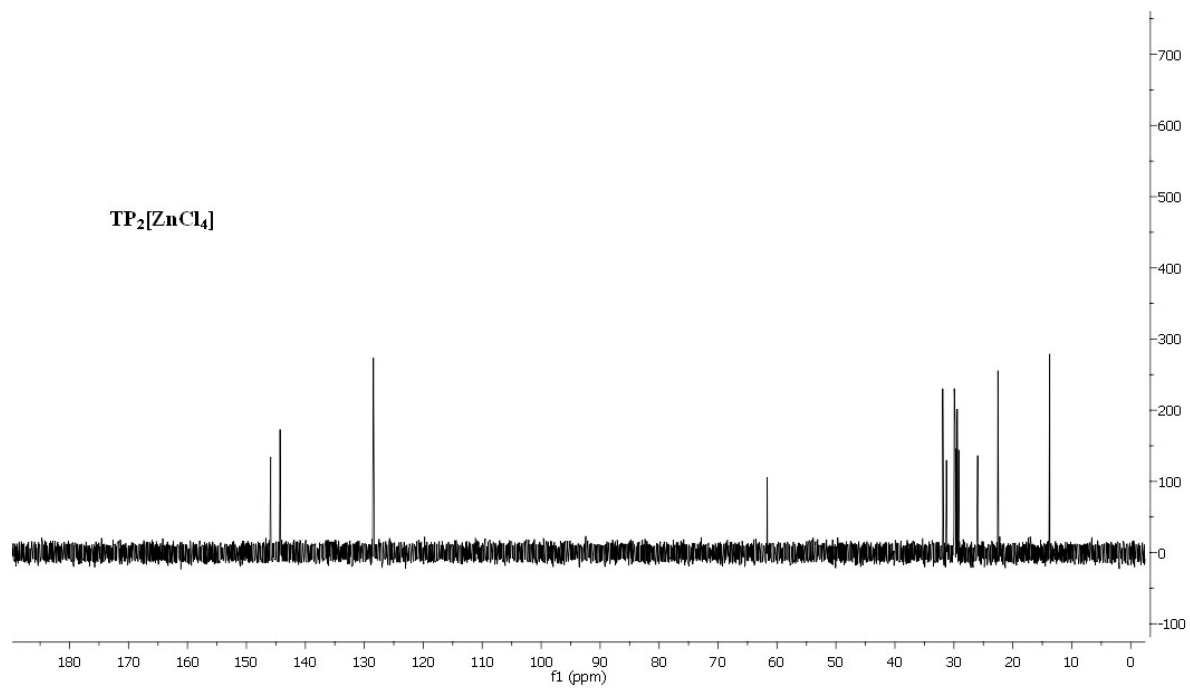

Fig. S3. <sup>13</sup>C NMR spectra of TPC and TP<sub>2</sub>[MCl<sub>4</sub>] metallosurfactants.



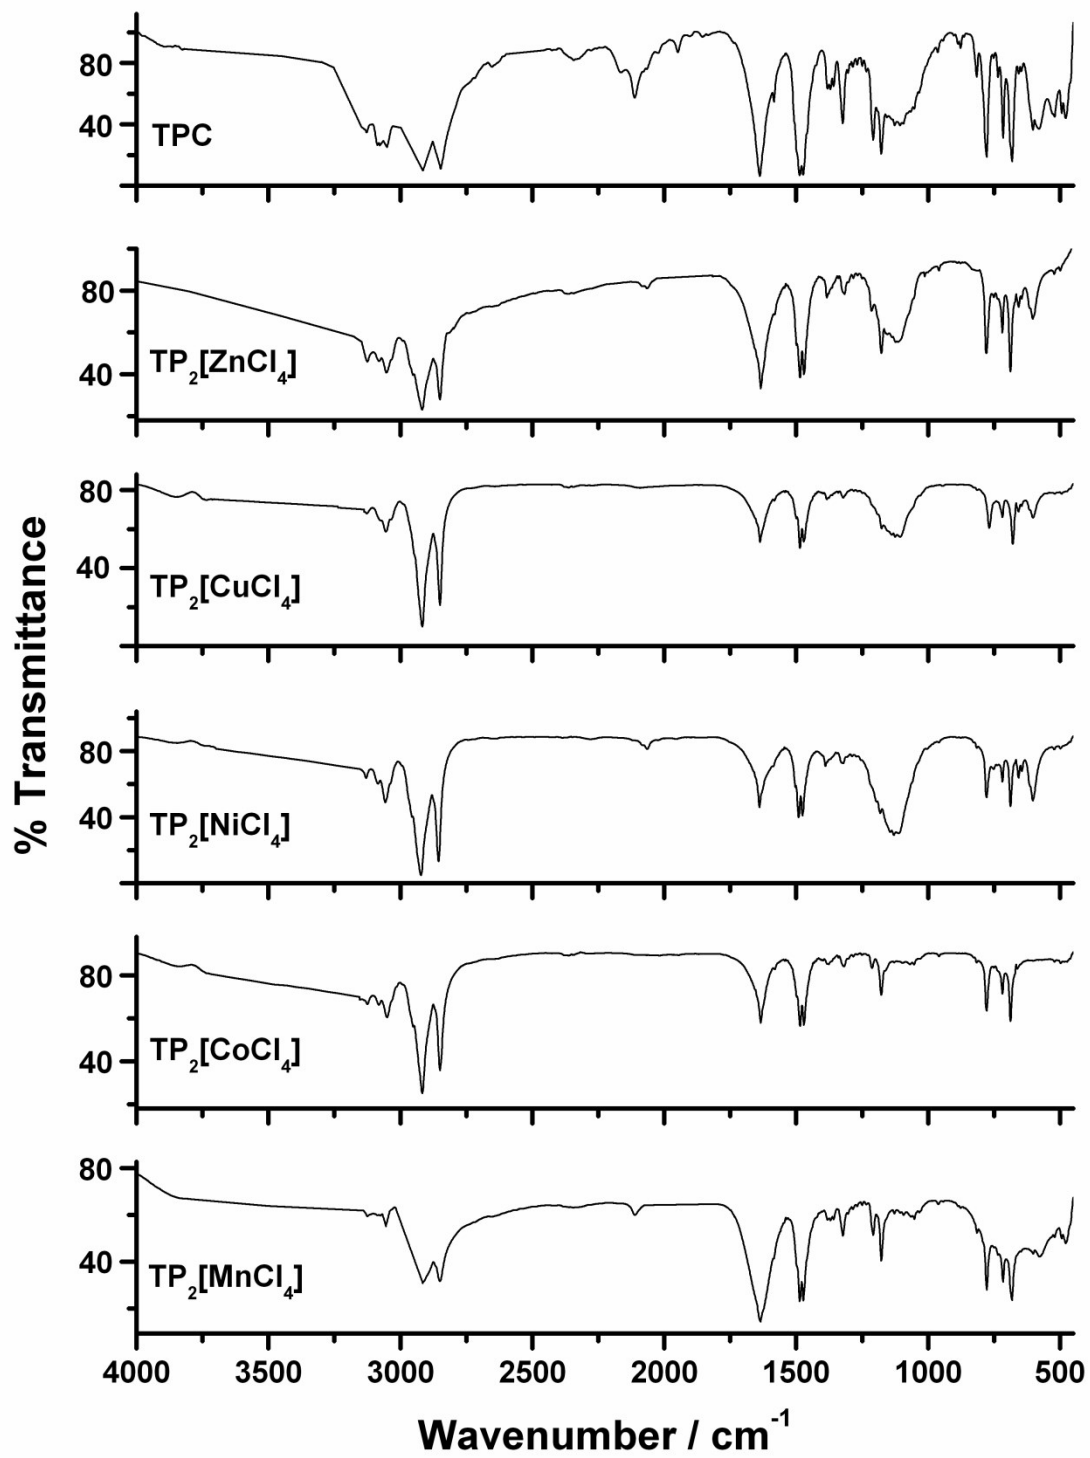

Fig. S4. FTIR spectra of TPC and TP<sub>2</sub>[MCl<sub>4</sub>] metallosurfactants.
